# Supplementary material
Source: PubMed Central journal article supplement (PMC5595757)

**Supplementary Table 1.** List of primers used

| <b>Gene</b>     | <b>Primer Forward</b>        | <b>Primer Reverse</b>  |
|-----------------|------------------------------|------------------------|
| <b>hCD44</b>    | AGAAGGTGTGGGCAGAAGAA         | AAATGCACCATTTCTGAGA    |
| <b>hHAS1</b>    | GAGCCTCTTCGCGTACCTG          | CCTCCTGGTAGGCGGAGAT    |
| <b>hHAS2</b>    | TCCTGGATCTCATTCCCTCAGC       | TGCACTGAACACACCCAAAATA |
| <b>hHAS3</b>    | CGCAGCAACTTCCATGAGG          | AGTCGCACACCTGGATGTAGT  |
| <b>hHPRT1</b>   | TGACCTTGATTTATTTTGCATA<br>CC | CGAGCAAGACGTTTCAGTCCT  |
| <b>hHYAL2</b>   | CACGGGGCTTAGTGAGATG          | GTCACCCCAGAGGATGACAC   |
| <b>musHyal1</b> | CCTCAACCCTGCCAGTTTCTC        | CCCGCTTGTCACACCACTT    |
| <b>musHyal2</b> | GCAGGACTAGGTCCCATCATC        | TTCCATGCTACCACAAAGGGT  |
| <b>musHyal3</b> | TCTGTGGTATGGAATGTACCCT       | TTTTGGCCGTGAAAATGTTGG  |
| <b>hNRF2</b>    | ACACGGTCCACAGCTCATC          | GCCTCCAAAGTATGTCAATCAA |
| <b>hSDHA</b>    | GAGGCAGGGTTTAATACAGCA        | CCAGTTGTCCTCCTCCATGT   |

Mouse RT-PCR was performed using custom Prime PCR plates with primers designed and validated by BioRad (Hercules, CA).

**Supplementary Table 2.** List of BioRad primers used

| <b>Gene</b> | <b>Unique Assay ID</b> | <b>Amplicon Context sequence</b>                                                                                                                         |
|-------------|------------------------|----------------------------------------------------------------------------------------------------------------------------------------------------------|
| <b>Actb</b> | qMmuCED002<br>7505     | TGCTCGAAGTCTAGAGCAACATAGCACAGCTTCTCTTTG<br>ATGTCACGCACGATTTCCCTCTCAGCTGTGGTGGTGAAG<br>CTGTAGCCACGCTCGGTTCAGGATCTTCATGAGGTAGTCT<br>GTCAGGTCCCGGCCAGCCAGGT |
| <b>Cd44</b> | qMmuCEP0062<br>158     | AGTTAATGGCGTAGGCACTACACCCCAATCTTCATGTCC<br>ACACTCTGCAGATTCCGGGTCTCGTCAGCTGTCATACAC<br>TGGTCCGGGGTCTCTGATGGTTCCTTGTTACCAAATG                              |

|               |                    |                                                                                                                                                                                                             |
|---------------|--------------------|-------------------------------------------------------------------------------------------------------------------------------------------------------------------------------------------------------------|
| <b>Col1a1</b> | qMmuCID0021<br>007 | CCTCTTAGGGGCCACTGCCCTCCTGACGCATGGCCAAG<br>AAGACATCCCTGAAGTCAGCTGCATACACAATGGCCTA<br>AGGGTCCCCAATGGTGAGACGTGGAAACCCGAGGTATG<br>CTTGATCTGTATCTGCCACA                                                          |
| <b>Col1a2</b> | qMmuCID0021<br>177 | GGCAACAGCAGGTTACCTACTCTGTCCTAGTCGATGG<br>CTGCTCCAAAAGACAAATGAATGGGGCAAGACAATCA<br>TTGAATACAAAACAAATAAGCCATCTCGCCTGCCGTT<br>CTTGACATTGCACCTCTGGACATTGGTGGTGCTGAC                                             |
| <b>Col3a1</b> | qMmuCID0006<br>332 | ATTTAGACATGATGAGCTTTGTGCAAAGTGGAACCTGG<br>TTTCTTCTCACCCTTCTTCATCCCCTCTTATTTTGGCAC<br>AGCAGTCCAACGTAGATGAATTGGGATGCAGCCACCTT<br>GGTCAGTCCTATGAGTCTAGAGATGTCTGGAAGCCAGA<br>ACCATGTCAAATATGTGTCTGTGACTCAGGATCT |
| <b>Has1</b>   | qMmuCIP0036<br>412 | TCTCCGAGTAGCATCTGGAGCGCGAGGTATACTTGGTA<br>GCATAGCCCATGCTAAGCATTCGGTTGGTGAGGTGCCT<br>GTCATCCCCAAATGTGCAGTGGGTGCCCAGGAACCTTT<br>GGTTGTACCAGGCCTCCAAGAACTGCTGCAG                                               |
| <b>Has2</b>   | qMmuCID0011<br>459 | ACATCTCCTCCAACACCTCCAACCATAGGGTCTTCCTCT<br>AAGACCTTCACCATCTCCACAGATGAGGCAGGGTCAAG<br>CATAGTATCTGAGTCACACACCTGTACATAATCCACGCT<br>TCGCCCCAGTGCTCTGAAGGCTGTG                                                   |
| <b>Has3</b>   | qMmuCID0014<br>012 | TCAAGGCCCTTGGCAACTCAGTGGACTACATCCAGGTG<br>TGTGACTCTGACACTGTGCTGGACCCAGCCTGCACCATT<br>GAGATGCTTCGAGTCTTGGAAGAAGATCCCCAAGTA                                                                                   |
| <b>Hyal1</b>  | qMmuCEP0042<br>433 | GCCTGCAGCACTGATGGGCACAGAGAAGTCACAGATGT<br>ACGTTTCGACACCGTGTGCAAGAGGCGCTCCGTGTGGCT<br>ATAGTTTCCAGAGACCCCATGTGCCCGTAAT<br>GCCCTACGTCCAGATCTTCTATGAAA                                                          |
| <b>Hyal2</b>  | qMmuCEP0052<br>809 | TTTGAGTTCGCCGCTCGGCAGTTCATGTTGAACACTCTC<br>CGTTACGTCAAGGCAGTCAGACCCAGCACCTGTGGGG<br>CTTCTACCTCTTTCCTGACTGCTACAATCACGATTATGT<br>ACAGAACTG                                                                    |
| <b>Hyal3</b>  | qMmuCEP0052<br>809 | TTTGAGTTCGCCGCTCGGCAGTTCATGTTGAACACTCTC<br>CGTTACGTCAAGGCA<br>GTCAGACCCAGCACCTGTGGGGCTTCTACCTCTTTCCT<br>GACTGCTACAATCAC<br>GATTATGTACAGAACTG                                                                |
| <b>Fn1</b>    | qMmuCID0019<br>534 | TTGTAGGTGACCCCTCTGGTAAGGCCAGTCAGAGTCGA<br>CTGGTAGAAGTTCCAGGAACCTTGGAACTGTAAGGGCTC                                                                                                                           |

|             |                    |                                                                                                                                                 |
|-------------|--------------------|-------------------------------------------------------------------------------------------------------------------------------------------------|
|             |                    | TTCGTCGGTGCCAACTGGTTGGCATGAAATGATGTACTC<br>AGAACTCTCCTGGAACGG                                                                                   |
| <b>Nrf2</b> | qMmuCIP0033<br>901 | ACTTACTCCAAGATCTATGTCTTGCCTCCAAAGGATGTC<br>AATCAAATCCATGTCCTGCTGGGACTGTAGTCCTGGCG<br>GTGGCAACTCCAAGTCCATCATGCTGAGGGCGGACGCT<br>GTGGTAGGGC       |
| <b>Tbp</b>  | qMmuCID0040<br>542 | TCTGAGTACTGAAGAAAGGGAGAATCATGGACCAGAAC<br>AACAGCCTTCCACCTTATGCTCAGGGCTTGGCCTCCCA<br>CAGGGCGCCATGACTCCTGGAATTCCCATCTTTAGTCCA<br>ATGATGCCTTACGGCA |

**Supplementary Table 3.** List of primary antibodies used.

|                               |                                                                 |
|-------------------------------|-----------------------------------------------------------------|
| <b><math>\alpha</math>SMA</b> | A5228 Sigma Aldrich (St Louis, MO)<br>(IHC 1:1000)              |
| <b>CD44</b>                   | 10R-2062 Fitzgerald (Acton, MA)<br>(IB: 1:1000)                 |
| <b>Hyaluronan</b>             | #385911 CalBioChem (San Diego, Ca)<br>(1:125 IHC)               |
| <b>Has1</b>                   | PA550674 Thermo Fisher (Waltham, MA)<br>(IB: 1:500) (IHC 1:100) |
| <b>Has2</b>                   | abx10958 Abbexa (Cambridge, UK)<br>(IHC 1:200)                  |
| <b>Has3</b>                   | sc-365322 Santa Cruz (Santa Cruz, CA)<br>(IHC 1:200)            |
| <b>Hyal1</b>                  | sc-101340 Santa Cruz                                            |

|                |                                                                                                   |
|----------------|---------------------------------------------------------------------------------------------------|
|                | (IB: 1:200)                                                                                       |
| <b>Hyal2</b>   | sc-99022 Santa Cruz<br>(IB 1:200)                                                                 |
| <b>Hyal3</b>   | PA1856 Boster Bio (Pleasanton, CA)<br>(IB 1:100)                                                  |
| <b>HABP2</b>   | PA5-25573, Thermo Fisher Scientific,<br>(Waltham MA) (IHC 1:100)                                  |
| <b>GEFT</b>    | GTX121237 GeneTex (Irvine, CA)<br>(IB 1:1000) human or<br>sc-16137 Santa Cruz<br>(IB 1:200) mouse |
| <b>GAPDH</b>   | AM4300 Thermo Fisher Scientific (IB<br>1:1000)                                                    |
| <b>β-Actin</b> | A5316 Sigma Aldrich (IB 1:1000)                                                                   |

Figure S1

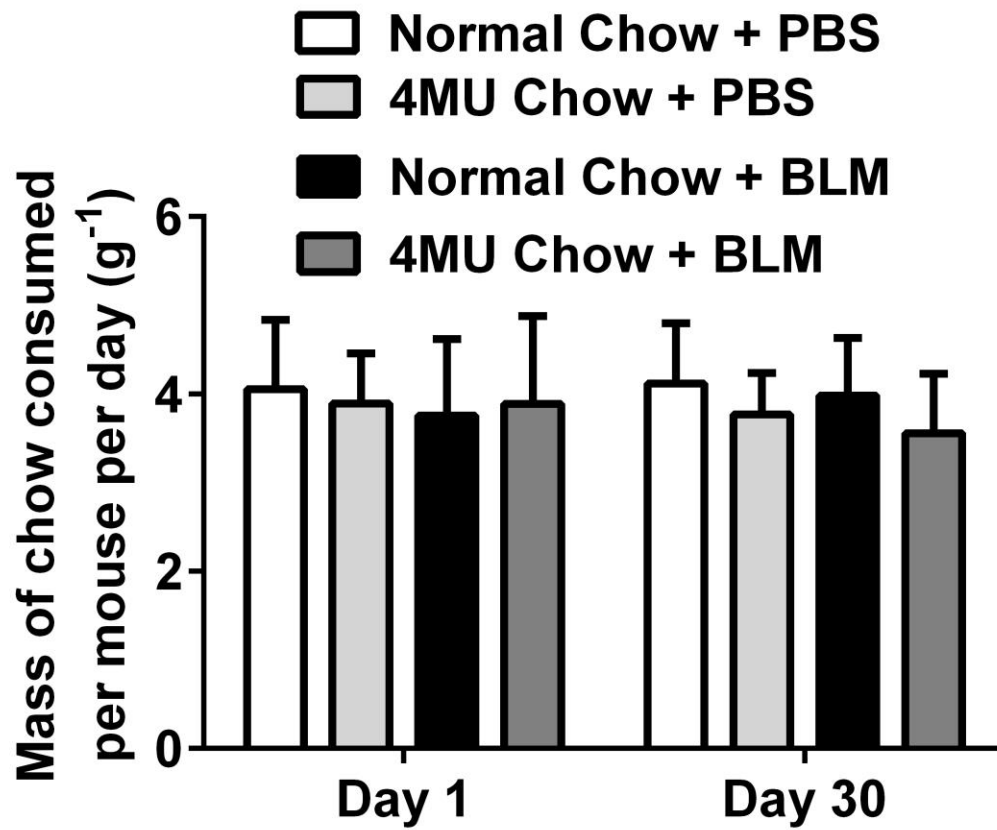

Figure S2

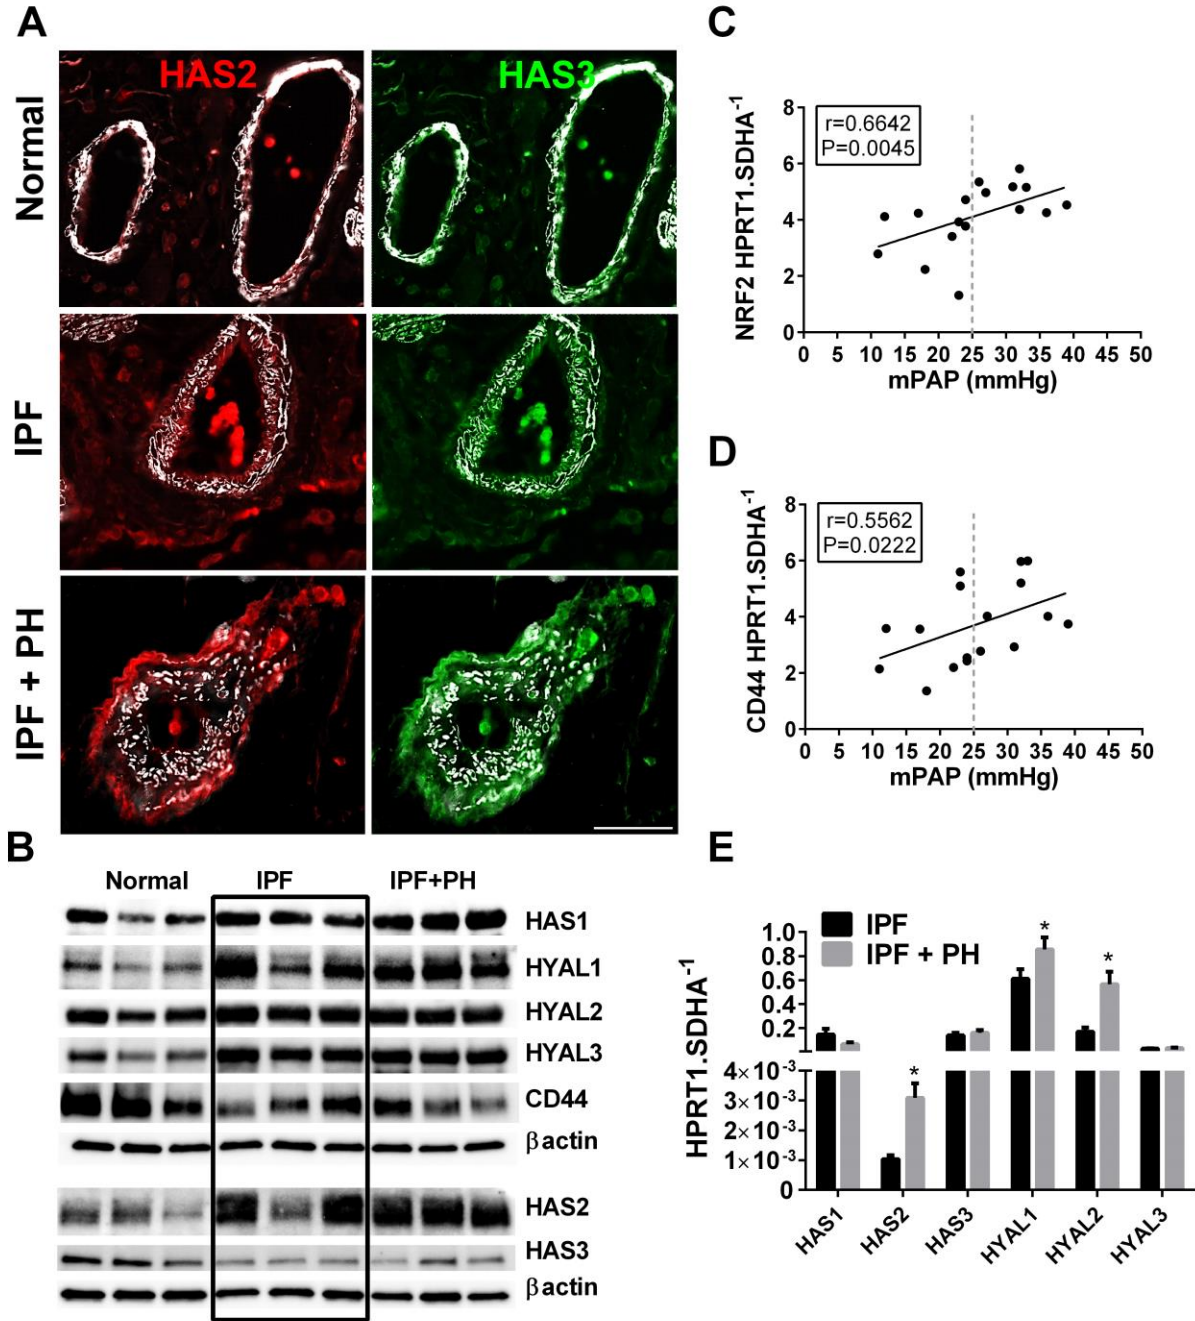

Figure S3

A

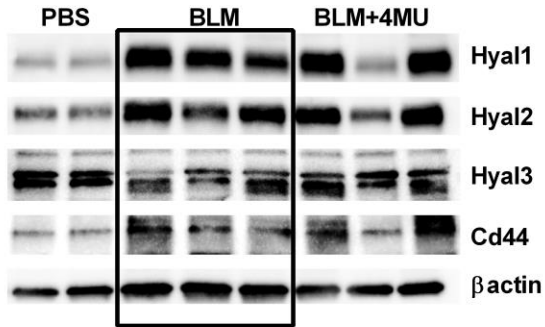

D

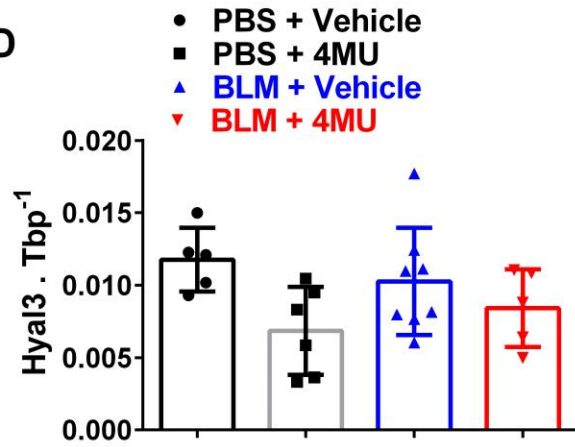

B

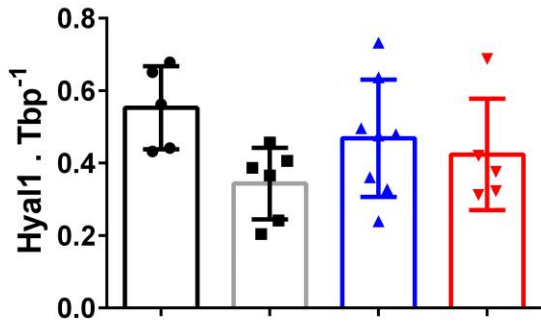

E

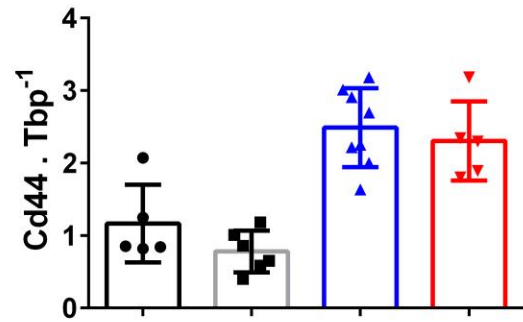

C

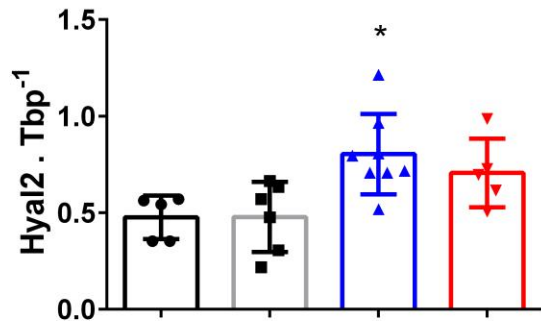

F

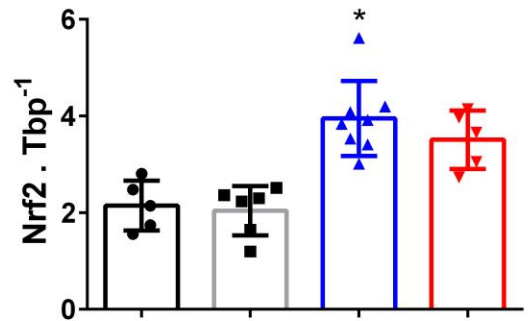

**Figure S4**

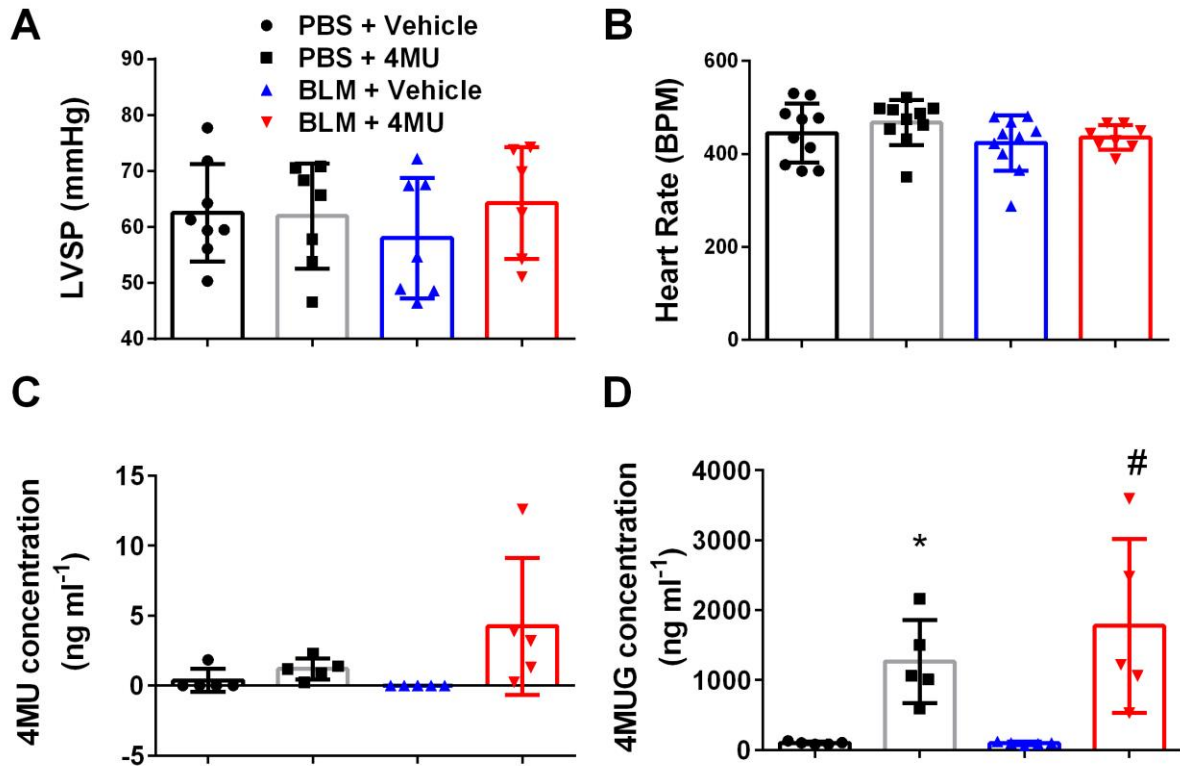



Figure S5

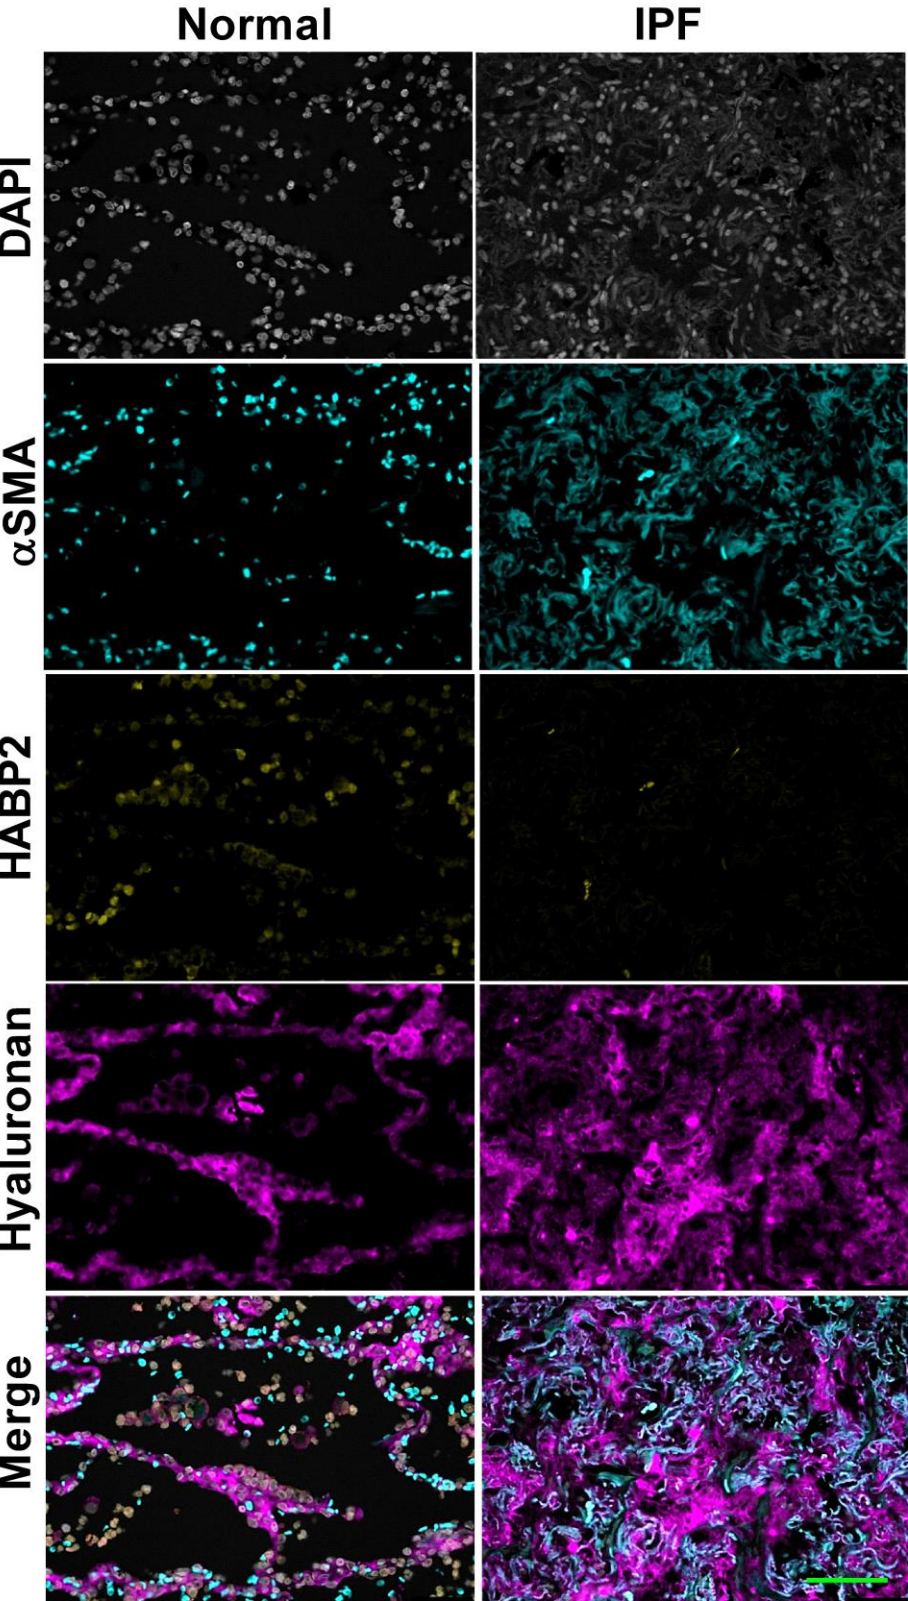

Supplement: BPH-174-3284-s001.pdf [file BPH-174-3284-s001.pdf]
